# Supplementary material for: Syntheses, structures and characterization of non-centrosymmetric Rb2Zn3(P2O7)2and centrosymmetric Cs2M3(P2O7)2(M = Zn and Mg)
Source: Royal Society of Chemistry journal article supplement (doi:10.1039/d0qi00689k), 2020-01-01
Supplement: d0qi00689k1.pdf [file d0qi00689k1.pdf]

**Syntheses, structures and characterization of non-centrosymmetric**

**$\text{Rb}_2\text{Zn}_3(\text{P}_2\text{O}_7)_2$  and centrosymmetric  $\text{Cs}_2\text{M}_3(\text{P}_2\text{O}_7)_2$  (M= Zn, Mg)**

Zhongfu Song,<sup>1</sup> Hongwei Yu,<sup>1</sup> Hongping Wu,<sup>\*1</sup> Zhanggui Hu,<sup>1</sup> Jiyang Wang,<sup>1</sup>

Yicheng Wu<sup>1</sup>

*<sup>1</sup>Tianjin Key Laboratory of Functional Crystal Materials, Institute of Functional  
Crystal, Tianjin University of Technology, Tianjin 300384, China.*

*To whom correspondence should be addressed: wuhp@ms.xjb.ac.cn.*

## CONTENTS

|                                                                                                                                                                                          |     |
|------------------------------------------------------------------------------------------------------------------------------------------------------------------------------------------|-----|
| Table S1. (Atomic coordinates, displacement parameters and BVS of $\text{Rb}_2\text{Zn}_3(\text{P}_2\text{O}_7)_2$ and $\text{Cs}_2\text{M}_3(\text{P}_2\text{O}_7)_2$ (M= Zn, Mg))..... | S3  |
| Table S2. (selected bond distances and angles(degrees) $\text{Rb}_2\text{Zn}_3(\text{P}_2\text{O}_7)_2$ and $\text{Cs}_2\text{M}_3(\text{P}_2\text{O}_7)_2$ (M= Zn, Mg)) .....           | S6  |
| Figure S1. (XRD of $\text{Rb}_2\text{Zn}_3(\text{P}_2\text{O}_7)_2$ and $\text{Cs}_2\text{M}_3(\text{P}_2\text{O}_7)_2$ (M= Zn,Mg)) .....                                                | S14 |
| Figure S2. (Rb-O chains structure of the $\text{Rb}_2\text{Zn}_3(\text{P}_2\text{O}_7)_2$ ) .....                                                                                        | S15 |
| Figure S3. (Cs-O framework structure of $\text{Cs}_2\text{M}_3(\text{P}_2\text{O}_7)_2$ (M = Zn, Mg)) .....                                                                              | S16 |
| Figure S4. (IR Spectrum of $\text{Rb}_2\text{Zn}_3(\text{P}_2\text{O}_7)_2$ and $\text{Cs}_2\text{M}_3(\text{P}_2\text{O}_7)_2$ (M= Zn, Mg)) .....                                       | S17 |
| Figure S5. (UV-VIS-NIR spectrum of $\text{Rb}_2\text{Zn}_3(\text{P}_2\text{O}_7)_2$ and $\text{Cs}_2\text{M}_3(\text{P}_2\text{O}_7)_2$ (M= Zn, Mg)) .....                               | S18 |
| Figure S6. (VE occupied and unoccupied of the $\text{Rb}_2\text{Zn}_3(\text{P}_2\text{O}_7)_2$ ) .....                                                                                   | S19 |
| Figure S7. The Powder XRD patterns of $\text{Cs}_2\text{Zn}_3(\text{P}_2\text{O}_7)_2$ at different temperature..                                                                        | S20 |

**Table S1(a).** Atomic coordinates ( $\times 10^4$ ) and equivalent isotropic displacement parameters ( $\text{\AA}^2 \times 10^3$ ) for  $\text{Rb}_2\text{Zn}_3(\text{P}_2\text{O}_7)_2$ .  $U_{\text{eq}}$  is defined as one-third of the trace of the orthogonalized  $U_{ij}$  tensor.

| Atom  | x           | y           | z           | U(eq)       | BVS  |
|-------|-------------|-------------|-------------|-------------|------|
| Rb(1) | 0.44683(9)  | 0.87890(9)  | 0.41697(5)  | 0.02234(15) | 1.03 |
| Rb(2) | 0.88898(9)  | 0.12121(10) | 0.09426(5)  | 0.02308(15) | 0.94 |
| Zn(1) | 0.70864(9)  | 0.62822(10) | 0.09790(5)  | 0.01161(15) | 2.14 |
| Zn(2) | 0.29206(10) | 0.24808(9)  | 0.26322(5)  | 0.01199(15) | 2.04 |
| Zn(3) | 0.95159(10) | 0.71784(10) | 0.38728(5)  | 0.01441(16) | 2.16 |
| P(1)  | 0.3883(2)   | 0.9042(2)   | 0.10793(11) | 0.0099(3)   | 5.08 |
| P(2)  | 0.6649(2)   | 0.4161(2)   | 0.31040(11) | 0.0115(3)   | 5.09 |
| P(3)  | 0.1352(2)   | 0.6135(2)   | 0.18340(10) | 0.0099(3)   | 5.06 |
| P(4)  | 0.9333(2)   | 0.1413(2)   | 0.38834(11) | 0.0114(3)   | 5.12 |
| O(1)  | 0.5862(5)   | 0.8657(6)   | 0.0792(3)   | 0.0180(9)   | 2.05 |
| O(2)  | 0.1565(6)   | 0.4072(6)   | 0.1682(3)   | 0.0155(9)   | 2.01 |
| O(3)  | 0.9698(6)   | 0.6943(6)   | 0.1252(3)   | 0.0177(10)  | 2.02 |
| O(4)  | 0.3122(5)   | 0.6997(6)   | 0.1316(3)   | 0.0130(9)   | 2.14 |
| O(5)  | 0.1356(5)   | 0.1389(7)   | 0.3653(3)   | 0.0217(10)  | 2.03 |
| O(6)  | 0.5029(6)   | 0.3143(6)   | 0.3542(3)   | 0.0158(9)   | 2.01 |
| O(7)  | 0.6269(6)   | 0.4651(7)   | 0.2010(3)   | 0.0247(11)  | 1.97 |
| O(8)  | 0.7230(6)   | 0.5754(6)   | 0.3782(4)   | 0.0225(11)  | 2.06 |
| O(9)  | 0.8381(6)   | 0.2782(6)   | 0.3058(3)   | 0.0164(10)  | 2.20 |
| O(10) | 0.1465(6)   | 0.6668(6)   | 0.2940(3)   | 0.0200(10)  | 1.98 |
| O(11) | 0.8933(6)   | 0.2187(8)   | 0.4907(3)   | 0.0327(13)  | 2.05 |
| O(12) | 0.8391(6)   | 0.9581(7)   | 0.3677(5)   | 0.0369(14)  | 2.04 |
| O(13) | 0.2657(6)   | 0.9755(6)   | 0.0212(3)   | 0.0210(10)  | 2.06 |
| O(14) | 0.3765(7)   | 0.0176(6)   | 0.2018(4)   | 0.0293(12)  | 2.03 |

**Table S1(b).** Atomic coordinates ( $\times 10^4$ ) and equivalent isotropic displacement parameters ( $\text{\AA}^2 \times 10^3$ ) for  $\text{Cs}_2\text{Zn}_3(\text{P}_2\text{O}_7)_2$ .  $U_{\text{eq}}$  is defined as one-third of the trace of the orthogonalized  $U_{ij}$  tensor.

| Atom  | x        | y        | z        | U(eq) | BVS  |
|-------|----------|----------|----------|-------|------|
| Cs(1) | 8999(1)  | 159(1)   | 8232(1)  | 23(1) | 1.09 |
| Cs(2) | 5936(1)  | 2535(1)  | 10276(1) | 29(1) | 0.92 |
| Zn(1) | 7437(1)  | -1450(1) | 6289(1)  | 14(1) | 2.19 |
| Zn(2) | 6147(1)  | 716(1)   | 12668(1) | 16(1) | 2.25 |
| Zn(3) | 11057(1) | 126(1)   | 6161(1)  | 13(1) | 2.23 |
| P(1)  | 8899(1)  | 1916(2)  | 5713(1)  | 13(1) | 5.13 |
| P(2)  | 11757(1) | -38(2)   | 8205(1)  | 13(1) | 5.08 |
| P(3)  | 6079(1)  | -60(2)   | 8052(1)  | 14(1) | 5.23 |
| P(4)  | 6817(1)  | -2952(2) | 9249(1)  | 14(1) | 5.10 |
| O(1)  | 11222(4) | -866(6)  | 7391(3)  | 17(1) | 2.10 |
| O(2)  | 12854(4) | -374(7)  | 8244(3)  | 22(1) | 2.08 |
| O(3)  | 11510(4) | 1934(6)  | 8326(3)  | 16(1) | 2.00 |
| O(4)  | 6589(4)  | -3034(6) | 10251(3) | 22(1) | 2.05 |
| O(5)  | 6559(4)  | -904(6)  | 8974(3)  | 22(1) | 2.20 |
| O(6)  | 8696(3)  | 4023(6)  | 5899(3)  | 14(1) | 2.10 |
| O(7)  | 6125(4)  | -4191(6) | 8720(3)  | 23(1) | 2.06 |
| O(8)  | 8038(4)  | 907(6)   | 6079(4)  | 24(1) | 2.10 |
| O(9)  | 8973(4)  | 1847(6)  | 4683(3)  | 26(1) | 2.08 |
| O(10) | 7901(4)  | -3163(7) | 9049(4)  | 26(1) | 2.08 |
| O(11) | 9861(4)  | 1493(7)  | 6214(4)  | 27(1) | 2.13 |
| O(12) | 6333(5)  | 1902(6)  | 8181(4)  | 34(2) | 2.03 |
| O(13) | 4993(4)  | -447(7)  | 8113(4)  | 31(1) | 2.14 |
| O(14) | 6550(5)  | -932(7)  | 7260(4)  | 40(2) | 2.06 |

**Table S1(c).** Atomic coordinates ( $\times 10^4$ ) and equivalent isotropic displacement parameters ( $\text{\AA}^2 \times 10^3$ ) for  $\text{Cs}_2\text{Mg}_3(\text{P}_2\text{O}_7)_2$ .  $U_{\text{eq}}$  is defined as one-third of the trace of the orthogonalized  $U_{ij}$  tensor.

| Atom  | x       | y        | z        | U(eq) | BVS  |
|-------|---------|----------|----------|-------|------|
| Cs(1) | 3930(1) | 517(1)   | 7929(1)  | 26(1) | 0.95 |
| Cs(2) | 963(1)  | -1971(1) | 5864(1)  | 31(1) | 0.94 |
| Mg(1) | 4019(2) | 2547(3)  | 5394(2)  | 13(1) | 2.16 |
| Mg(2) | 1193(2) | -6840(3) | 6760(2)  | 15(1) | 2.17 |
| Mg(3) | 2486(2) | -3840(3) | 8743(2)  | 15(1) | 2.13 |
| P(1)  | 3888(1) | -1833(3) | 5551(1)  | 14(1) | 5.17 |
| P(2)  | 1761(2) | 2595(3)  | 9629(1)  | 14(1) | 5.05 |
| P(3)  | 1116(1) | -123(3)  | 8253(1)  | 13(1) | 5.26 |
| P(4)  | 6709(1) | 376(3)   | 8075(1)  | 13(1) | 5.21 |
| O(1)  | 3067(4) | -2005(8) | 4868(4)  | 31(1) | 2.08 |
| O(2)  | 1146(4) | 935(7)   | 9198(3)  | 18(1) | 2.22 |
| O(3)  | 4090(4) | 90(7)    | 5826(4)  | 20(1) | 2.07 |
| O(4)  | 2857(4) | 2084(8)  | 9639(4)  | 23(1) | 2.01 |
| O(5)  | 1540(4) | 4250(7)  | 9056(4)  | 20(1) | 1.96 |
| O(6)  | 1799(4) | -1729(7) | 8345(4)  | 26(1) | 2.04 |
| O(7)  | 6067(4) | -1012(7) | 8516(3)  | 18(1) | 2.15 |
| O(8)  | 6525(4) | 2317(7)  | 8520(3)  | 19(1) | 2.25 |
| O(9)  | 1495(4) | 1166(7)  | 7545(3)  | 18(1) | 2.06 |
| O(10) | 6445(5) | 650(8)   | 7092(3)  | 28(1) | 1.96 |
| O(11) | 57(4)   | -605(8)  | 8099(4)  | 29(1) | 2.13 |
| O(12) | 1296(4) | 2817(8)  | 10548(3) | 23(1) | 2.04 |
| O(13) | 4809(4) | -2909(8) | 5315(4)  | 27(1) | 1.99 |
| O(14) | 7810(4) | 32(8)    | 8186(4)  | 28(1) | 2.09 |

**Table S2(a).** Selected bond distances (Å) and angles (degrees) for Rb<sub>2</sub>Zn<sub>3</sub>(P<sub>2</sub>O<sub>7</sub>)<sub>2</sub>.

|                   |            |                   |            |
|-------------------|------------|-------------------|------------|
| Rb(1)-O(12)       | 2.975(5)   | Rb(1)-O(5)        | 2.982(4)   |
| Rb(1)-O(11)       | 3.006(5)   | Rb(1)-O(8)        | 3.015(5)   |
| Rb(1)-O(14)       | 3.038(5)   | Rb(1)-O(10)       | 3.066(4)   |
| Rb(1)-O(6)        | 3.067(4)   | Rb(1)-O(6)        | 3.280(4)   |
| Rb(1)-O(8)        | 3.328(5)   | Rb(2)-O(7)        | 3.451(5)   |
| Rb(2)-O(1)        | 2.856(4)   | Rb(2)-O(2)        | 2.964(4)   |
| Rb(2)-O(9)        | 3.051(4)   | Rb(2)-O(13)       | 3.095(5)   |
| Rb(2)-O(3)        | 3.152(4)   | Rb(2)-O(13)       | 3.160(5)   |
| Rb(2)-O(3)        | 3.161(4)   | Rb(2)-O(4)        | 3.317(4)   |
| Zn(1)-O(7)        | 1.910(5)   | Zn(1)-O(13)       | 1.936(4)   |
| Zn(1)-O(1)        | 1.939(4)   | Zn(1)-O(3)        | 1.959(4)   |
| Zn(2)-O(2)        | 1.938(4)   | Zn(2)-O(5)        | 1.954(4)   |
| Zn(2)-O(14)       | 1.958(5)   | Zn(2)-O(6)        | 1.960(4)   |
| Zn(3)-O(11)       | 1.927(4)   | Zn(3)-O(12)       | 1.928(5)   |
| Zn(3)-O(10)       | 1.936(4)   | Zn(3)-O(8)        | 1.940(4)   |
| P(1)-O(14)        | 1.492(5)   | P(1)-O(13)        | 1.510(4)   |
| P(1)-O(1)         | 1.513(4)   | P(1)-O(4)         | 1.610(4)   |
| P(2)-O(7)         | 1.503(4)   | P(2)-O(8)         | 1.507(4)   |
| P(2)-O(6)         | 1.511(4)   | P(2)-O(9)         | 1.598(4)   |
| P(3)-O(10)        | 1.510(4)   | P(3)-O(3)         | 1.510(4)   |
| P(3)-O(2)         | 1.512(4)   | P(3)-O(4)         | 1.594(4)   |
| P(4)-O(5)         | 1.498(4)   | P(4)-O(11)        | 1.500(5)   |
| P(4)-O(12)        | 1.507(5)   | P(4)-O(9)         | 1.606(4)   |
| O(12)-Rb(1)-O(5)  | 122.63(13) | O(12)-Rb(1)-O(11) | 162.91(14) |
| O(5)-Rb(1)-O(11)  | 73.71(14)  | O(12)-Rb(1)-O(8)  | 57.73(13)  |
| O(5)-Rb(1)-O(8)   | 155.90(12) | O(11)-Rb(1)-O(8)  | 109.93(15) |
| O(12)-Rb(1)-O(14) | 81.86(15)  | O(5)-Rb(1)-O(14)  | 58.71(12)  |
| O(11)-Rb(1)-O(14) | 113.38(14) | O(8)-Rb(1)-O(14)  | 99.71(13)  |
| O(12)-Rb(1)-O(10) | 129.48(14) | O(5)-Rb(1)-O(10)  | 71.61(13)  |
| O(11)-Rb(1)-O(10) | 56.94(12)  | O(8)-Rb(1)-O(10)  | 90.16(11)  |
| O(14)-Rb(1)-O(10) | 65.10(13)  | O(12)-Rb(1)-O(6)  | 99.59(14)  |
| O(5)-Rb(1)-O(6)   | 112.43(12) | O(11)-Rb(1)-O(6)  | 67.01(11)  |
| O(8)-Rb(1)-O(6)   | 90.15(12)  | O(14)-Rb(1)-O(6)  | 169.02(12) |
| O(10)-Rb(1)-O(6)  | 120.12(12) | O(12)-Rb(1)-O(6)  | 68.53(12)  |
| O(5)-Rb(1)-O(6)   | 55.74(12)  | O(11)-Rb(1)-O(6)  | 125.52(14) |
| O(8)-Rb(1)-O(6)   | 124.46(12) | O(14)-Rb(1)-O(6)  | 57.68(11)  |
| O(10)-Rb(1)-O(6)  | 115.83(11) | O(6)-Rb(1)-O(6)   | 112.56(11) |
| O(12)-Rb(1)-O(8)  | 118.41(14) | O(5)-Rb(1)-O(8)   | 67.83(11)  |
| O(11)-Rb(1)-O(8)  | 60.33(12)  | O(8)-Rb(1)-O(8)   | 135.41(8)  |
| O(14)-Rb(1)-O(8)  | 124.53(12) | O(10)-Rb(1)-O(8)  | 111.80(11) |
| O(6)-Rb(1)-O(8)   | 45.30(10)  | O(6)-Rb(1)-O(8)   | 81.33(11)  |
| O(1)-Rb(2)-O(2)   | 163.22(12) | O(1)-Rb(2)-O(9)   | 100.76(12) |
| O(2)-Rb(2)-O(9)   | 62.46(11)  | O(1)-Rb(2)-O(13)  | 115.68(12) |

|                   |            |                   |            |
|-------------------|------------|-------------------|------------|
| O(2)-Rb(2)-O(13)  | 76.94(12)  | O(9)-Rb(2)-O(13)  | 123.24(11) |
| O(1)-Rb(2)-O(3)   | 108.36(12) | O(2)-Rb(2)-O(3)   | 87.66(11)  |
| O(9)-Rb(2)-O(3)   | 146.54(11) | O(13)-Rb(2)-O(3)  | 56.92(11)  |
| O(1)-Rb(2)-O(13)  | 103.60(11) | O(2)-Rb(2)-O(13)  | 78.93(11)  |
| O(9)-Rb(2)-O(13)  | 95.13(11)  | O(13)-Rb(2)-O(13) | 114.94(9)  |
| O(3)-Rb(2)-O(13)  | 62.63(11)  | O(1)-Rb(2)-O(3)   | 61.00(11)  |
| O(2)-Rb(2)-O(3)   | 121.52(11) | O(9)-Rb(2)-O(3)   | 105.77(11) |
| O(13)-Rb(2)-O(3)  | 63.24(12)  | O(3)-Rb(2)-O(3)   | 102.60(11) |
| O(13)-Rb(2)-O(3)  | 155.75(10) | O(1)-Rb(2)-O(4)   | 75.01(11)  |
| O(2)-Rb(2)-O(4)   | 115.72(10) | O(9)-Rb(2)-O(4)   | 134.25(10) |
| O(13)-Rb(2)-O(4)  | 97.79(10)  | O(3)-Rb(2)-O(4)   | 44.65(10)  |
| O(13)-Rb(2)-O(4)  | 45.02(10)  | O(3)-Rb(2)-O(4)   | 110.79(10) |
| O(1)-Rb(2)-O(7)   | 93.80(12)  | O(2)-Rb(2)-O(7)   | 73.86(11)  |
| O(9)-Rb(2)-O(7)   | 43.31(10)  | O(13)-Rb(2)-O(7)  | 150.48(12) |
| O(3)-Rb(2)-O(7)   | 117.07(11) | O(13)-Rb(2)-O(7)  | 55.01(11)  |
| O(3)-Rb(2)-O(7)   | 138.57(11) | O(4)-Rb(2)-O(7)   | 91.03(10)  |
| O(7)-Zn(1)-O(13)  | 105.6(2)   | O(7)-Zn(1)-O(1)   | 119.0(2)   |
| O(13)-Zn(1)-O(1)  | 117.16(19) | O(7)-Zn(1)-O(3)   | 109.73(18) |
| O(13)-Zn(1)-O(3)  | 99.71(18)  | O(1)-Zn(1)-O(3)   | 103.67(18) |
| O(14)-Zn(2)-O(6)  | 102.50(19) | O(2)-Zn(2)-O(5)   | 113.40(17) |
| O(2)-Zn(2)-O(14)  | 113.1(2)   | O(5)-Zn(2)-O(14)  | 98.0(2)    |
| O(2)-Zn(2)-O(6)   | 127.74(17) | O(5)-Zn(2)-O(6)   | 97.34(18)  |
| O(11)-Zn(3)-O(12) | 109.7(2)   | O(11)-Zn(3)-O(10) | 97.06(19)  |
| O(12)-Zn(3)-O(10) | 113.3(2)   | O(11)-Zn(3)-O(8)  | 121.1(2)   |
| O(12)-Zn(3)-O(8)  | 96.8(2)    | O(10)-Zn(3)-O(8)  | 119.44(19) |
| O(1)-P(1)-O(4)    | 102.1(2)   | O(14)-P(1)-O(13)  | 113.3(3)   |
| O(14)-P(1)-O(1)   | 113.1(3)   | O(13)-P(1)-O(1)   | 113.6(3)   |
| O(14)-P(1)-O(4)   | 108.2(3)   | O(13)-P(1)-O(4)   | 105.5(2)   |
| O(7)-P(2)-O(8)    | 115.4(3)   | O(7)-P(2)-O(6)    | 111.5(2)   |
| O(8)-P(2)-O(6)    | 110.2(3)   | O(7)-P(2)-O(9)    | 103.0(3)   |
| O(8)-P(2)-O(9)    | 107.4(2)   | O(6)-P(2)-O(9)    | 109.0(2)   |
| O(2)-P(3)-O(4)    | 104.0(2)   | O(10)-P(3)-O(3)   | 114.1(2)   |
| O(10)-P(3)-O(2)   | 112.2(2)   | O(3)-P(3)-O(2)    | 113.3(2)   |
| O(10)-P(3)-O(4)   | 107.5(2)   | O(3)-P(3)-O(4)    | 104.9(2)   |
| O(12)-P(4)-O(9)   | 103.8(3)   | O(5)-P(4)-O(11)   | 114.1(3)   |
| O(5)-P(4)-O(12)   | 112.8(3)   | O(11)-P(4)-O(12)  | 112.9(3)   |
| O(5)-P(4)-O(9)    | 105.2(2)   | O(11)-P(4)-O(9)   | 106.9(3)   |

**Table S2(b).** Selected bond distances (Å) and angles (degrees) for Cs<sub>2</sub>Zn<sub>3</sub>(P<sub>2</sub>O<sub>7</sub>)<sub>2</sub>.

|               |          |                      |            |
|---------------|----------|----------------------|------------|
| Cs(1)-O(9)#1  | 3.069(5) | P(3)-O(12)           | 1.504(5)   |
| Cs(1)-O(1)#2  | 3.094(4) | P(3)-O(5)            | 1.607(5)   |
| Cs(1)-O(10)   | 3.120(5) | P(4)-O(10)           | 1.501(5)   |
| Cs(1)-O(11)#3 | 3.214(5) | P(4)-O(4)            | 1.502(5)   |
| Cs(1)-O(11)   | 3.339(5) | P(4)-O(7)            | 1.510(5)   |
| Cs(1)-O(1)    | 3.344(5) | P(4)-O(5)            | 1.605(5)   |
| Cs(1)-O(3)#3  | 3.360(4) | O(9)#1-Cs(1)-O(1)#2  | 60.84(12)  |
| Cs(1)-O(8)    | 3.419(6) | O(9)#1-Cs(1)-O(10)   | 107.05(13) |
| Cs(1)-O(6)#3  | 3.432(5) | O(1)#2-Cs(1)-O(10)   | 145.07(13) |
| Cs(1)-O(5)    | 3.566(5) | O(9)#1-Cs(1)-O(11)#3 | 116.66(14) |
| Cs(1)-O(3)    | 3.626(5) | O(1)#2-Cs(1)-O(11)#3 | 156.97(13) |
| Cs(1)-O(14)   | 3.650(7) | O(10)-Cs(1)-O(11)#3  | 57.62(13)  |
| Cs(2)-O(13)#4 | 3.100(5) | O(9)#1-Cs(1)-O(11)   | 113.89(13) |
| Cs(2)-O(2)#5  | 3.121(5) | O(1)#2-Cs(1)-O(11)   | 59.48(12)  |
| Cs(2)-O(12)   | 3.152(6) | O(10)-Cs(1)-O(11)    | 138.35(13) |
| Cs(2)-O(8)#1  | 3.250(5) | O(11)#3-Cs(1)-O(11)  | 107.43(10) |
| Cs(2)-O(5)    | 3.298(5) | O(9)#1-Cs(1)-O(1)    | 116.15(13) |
| Cs(2)-O(7)#6  | 3.338(5) | O(1)#2-Cs(1)-O(1)    | 100.90(10) |
| Cs(2)-O(7)#4  | 3.393(5) | O(10)-Cs(1)-O(1)     | 113.30(12) |
| Cs(2)-O(4)#6  | 3.398(5) | O(11)#3-Cs(1)-O(1)   | 58.33(12)  |
| Cs(2)-O(4)#4  | 3.487(5) | O(11)-Cs(1)-O(1)     | 54.06(12)  |
| Zn(1)-O(14)   | 1.912(5) | O(9)#1-Cs(1)-O(3)#3  | 167.60(13) |
| Zn(1)-O(4)#7  | 1.917(5) | O(1)#2-Cs(1)-O(3)#3  | 117.45(12) |
| Zn(1)-O(3)#3  | 1.929(5) | O(10)-Cs(1)-O(3)#3   | 66.86(13)  |
| Zn(1)-O(8)    | 1.951(5) | O(11)#3-Cs(1)-O(3)#3 | 70.08(12)  |
| Zn(2)-O(13)#4 | 1.902(6) | O(11)-Cs(1)-O(3)#3   | 71.49(12)  |
| Zn(2)-O(7)#9  | 1.908(5) | O(1)-Cs(1)-O(3)#3    | 76.18(11)  |
| Zn(2)-O(2)#5  | 1.928(5) | O(9)#1-Cs(1)-O(8)    | 120.57(12) |
| Zn(2)-O(12)#1 | 1.932(5) | O(1)#2-Cs(1)-O(8)    | 62.85(11)  |
| Zn(3)-O(11)   | 1.905(5) | O(10)-Cs(1)-O(8)     | 107.88(13) |
| Zn(3)-O(9)#10 | 1.912(5) | O(11)#3-Cs(1)-O(8)   | 122.54(12) |
| Zn(3)-O(10)#2 | 1.919(5) | O(11)-Cs(1)-O(8)     | 43.31(12)  |
| Zn(3)-O(1)    | 1.948(5) | O(1)-Cs(1)-O(8)      | 91.32(12)  |
| P(1)-O(8)     | 1.487(5) | O(3)#3-Cs(1)-O(8)    | 54.89(11)  |
| P(1)-O(11)    | 1.506(5) | O(9)#1-Cs(1)-O(6)#3  | 86.84(13)  |
| P(1)-O(9)     | 1.510(5) | O(1)#2-Cs(1)-O(6)#3  | 114.98(12) |
| P(1)-O(6)     | 1.608(4) | O(10)-Cs(1)-O(6)#3   | 95.52(12)  |
| P(2)-O(2)     | 1.496(5) | O(11)#3-Cs(1)-O(6)#3 | 43.67(11)  |
| P(2)-O(1)     | 1.508(5) | O(11)-Cs(1)-O(6)#3   | 94.05(12)  |
| P(2)-O(3)     | 1.509(4) | O(1)-Cs(1)-O(6)#3    | 43.25(11)  |
| P(2)-O(6)#3   | 1.612(4) | O(3)#3-Cs(1)-O(6)#3  | 104.23(11) |
| P(3)-O(14)    | 1.478(5) | O(8)-Cs(1)-O(6)#3    | 134.52(11) |
| P(3)-O(13)    | 1.493(5) | O(9)#1-Cs(1)-O(5)    | 85.74(13)  |



|                      |            |                       |            |
|----------------------|------------|-----------------------|------------|
| O(1)#2-Cs(1)-O(5)    | 102.49(12) | O(13)#4-Cs(2)-O(7)#4  | 60.43(13)  |
| O(10)-Cs(1)-O(5)     | 42.57(11)  | O(2)#5-Cs(2)-O(7)#4   | 107.79(12) |
| O(11)#3-Cs(1)-O(5)   | 100.04(12) | O(12)-Cs(2)-O(7)#4    | 129.04(14) |
| O(11)-Cs(1)-O(5)     | 132.29(12) | O(8)#1-Cs(2)-O(7)#4   | 115.37(12) |
| O(1)-Cs(1)-O(5)      | 153.83(11) | O(5)-Cs(2)-O(7)#4     | 138.46(12) |
| O(3)#3-Cs(1)-O(5)    | 82.71(11)  | O(7)#6-Cs(2)-O(7)#4   | 96.10(11)  |
| O(8)-Cs(1)-O(5)      | 89.01(12)  | O(13)#4-Cs(2)-O(4)#6  | 126.76(13) |
| O(6)#3-Cs(1)-O(5)    | 131.60(11) | O(2)#5-Cs(2)-O(4)#6   | 111.82(13) |
| O(9)#1-Cs(1)-O(3)    | 74.67(12)  | O(12)-Cs(2)-O(4)#6    | 94.82(12)  |
| O(1)#2-Cs(1)-O(3)    | 75.50(11)  | O(8)#1-Cs(2)-O(4)#6   | 55.78(12)  |
| O(10)-Cs(1)-O(3)     | 136.00(12) | O(5)-Cs(2)-O(4)#6     | 132.13(12) |
| O(11)#3-Cs(1)-O(3)   | 81.79(11)  | O(7)#6-Cs(2)-O(4)#6   | 42.89(12)  |
| O(11)-Cs(1)-O(3)     | 65.51(12)  | O(7)#4-Cs(2)-O(4)#6   | 82.49(11)  |
| O(1)-Cs(1)-O(3)      | 41.95(10)  | O(13)#4-Cs(2)-O(4)#4  | 79.30(13)  |
| O(3)#3-Cs(1)-O(3)    | 117.40(8)  | O(2)#5-Cs(2)-O(4)#4   | 134.37(12) |
| O(8)-Cs(1)-O(3)      | 108.09(11) | O(12)-Cs(2)-O(4)#4    | 89.17(14)  |
| O(6)#3-Cs(1)-O(3)    | 40.56(10)  | O(8)#1-Cs(2)-O(4)#4   | 151.42(11) |
| O(5)-Cs(1)-O(3)      | 158.66(11) | O(5)-Cs(2)-O(4)#4     | 102.29(12) |
| O(9)#1-Cs(1)-O(14)   | 113.91(13) | O(7)#6-Cs(2)-O(4)#4   | 81.97(12)  |
| O(1)#2-Cs(1)-O(14)   | 90.95(13)  | O(7)#4-Cs(2)-O(4)#4   | 41.93(12)  |
| O(10)-Cs(1)-O(14)    | 62.84(14)  | O(4)#6-Cs(2)-O(4)#4   | 98.40(11)  |
| O(11)#3-Cs(1)-O(14)  | 109.45(13) | O(13)#4-Cs(2)-O(5)#4  | 40.60(12)  |
| O(11)-Cs(1)-O(14)    | 92.89(13)  | O(2)#5-Cs(2)-O(5)#4   | 95.16(12)  |
| O(1)-Cs(1)-O(14)     | 127.89(11) | O(12)-Cs(2)-O(5)#4    | 113.97(13) |
| O(3)#3-Cs(1)-O(14)   | 53.84(11)  | O(8)#1-Cs(2)-O(5)#4   | 141.82(12) |
| O(8)-Cs(1)-O(14)     | 50.05(11)  | O(5)-Cs(2)-O(5)#4     | 99.17(11)  |
| O(6)#3-Cs(1)-O(14)   | 152.99(11) | O(7)#6-Cs(2)-O(5)#4   | 120.94(12) |
| O(5)-Cs(1)-O(14)     | 40.56(12)  | O(7)#4-Cs(2)-O(5)#4   | 41.09(11)  |
| O(3)-Cs(1)-O(14)     | 158.13(11) | O(4)#6-Cs(2)-O(5)#4   | 123.18(11) |
| O(13)#4-Cs(2)-O(2)#5 | 55.34(13)  | O(4)#4-Cs(2)-O(5)#4   | 39.23(11)  |
| O(13)#4-Cs(2)-O(12)  | 137.87(14) | Zn(2)-Cs(2)-O(5)#4    | 70.33(8)   |
| O(2)#5-Cs(2)-O(12)   | 119.96(13) | O(14)-Zn(1)-O(4)#7    | 104.8(3)   |
| O(13)#4-Cs(2)-O(8)#1 | 105.36(14) | O(14)-Zn(1)-O(3)#3    | 112.0(2)   |
| O(2)#5-Cs(2)-O(8)#1  | 59.66(12)  | O(4)#7-Zn(1)-O(3)#3   | 121.8(2)   |
| O(12)-Cs(2)-O(8)#1   | 103.82(14) | O(14)-Zn(1)-O(8)      | 101.8(2)   |
| O(13)#4-Cs(2)-O(5)   | 99.43(14)  | O(4)#7-Zn(1)-O(8)     | 107.2(2)   |
| O(2)#5-Cs(2)-O(5)    | 82.41(13)  | O(3)#3-Zn(1)-O(8)     | 107.3(2)   |
| O(12)-Cs(2)-O(5)     | 43.53(12)  | O(13)#4-Zn(2)-O(7)#9  | 113.2(2)   |
| O(8)#1-Cs(2)-O(5)    | 104.62(12) | O(13)#4-Zn(2)-O(2)#5  | 97.9(2)    |
| O(13)#4-Cs(2)-O(7)#6 | 156.51(13) | O(7)#9-Zn(2)-O(2)#5   | 120.1(2)   |
| O(2)#5-Cs(2)-O(7)#6  | 142.97(13) | O(13)#4-Zn(2)-O(12)#1 | 115.1(2)   |
| O(12)-Cs(2)-O(7)#6   | 55.25(12)  | O(7)#9-Zn(2)-O(12)#1  | 103.4(2)   |
| O(8)#1-Cs(2)-O(7)#6  | 84.80(13)  | O(2)#5-Zn(2)-O(12)#1  | 107.6(2)   |
| O(5)-Cs(2)-O(7)#6    | 98.31(12)  | O(11)-Zn(3)-O(9)#10   | 115.2(2)   |

|                       |          |                  |          |
|-----------------------|----------|------------------|----------|
| O(11)-Zn(3)-O(10)#2   | 106.0(2) | O(1)-P(2)-O(3)   | 112.6(3) |
| O(9)#10-Zn(3)-O(10)#2 | 114.0(2) | O(2)-P(2)-O(6)#3 | 106.7(3) |
| O(11)-Zn(3)-O(1)      | 104.1(2) | O(1)-P(2)-O(6)#3 | 106.4(3) |
| O(9)#10-Zn(3)-O(1)    | 107.9(2) | O(3)-P(2)-O(6)#3 | 103.6(2) |
| O(10)#2-Zn(3)-O(1)    | 109.1(2) | O(14)-P(3)-O(13) | 113.5(4) |
| O(8)-P(1)-O(11)       | 112.9(3) | O(14)-P(3)-O(12) | 114.8(3) |
| O(8)-P(1)-O(9)        | 114.1(3) | O(13)-P(3)-O(12) | 113.4(3) |
| O(11)-P(1)-O(9)       | 113.7(3) | O(14)-P(3)-O(5)  | 108.3(3) |
| O(8)-P(1)-O(6)        | 106.9(3) | O(13)-P(3)-O(5)  | 104.6(3) |
| O(11)-P(1)-O(6)       | 105.5(3) | O(12)-P(3)-O(5)  | 100.6(3) |
| O(9)-P(1)-O(6)        | 102.5(3) | O(10)-P(4)-O(4)  | 113.9(3) |
| O(10)-P(4)-O(5)       | 104.8(3) | O(10)-P(4)-O(7)  | 115.4(3) |
| O(4)-P(4)-O(5)        | 103.6(3) | O(4)-P(4)-O(7)   | 109.7(3) |
| O(2)-P(2)-O(1)        | 114.6(3) | O(7)-P(4)-O(5)   | 108.6(3) |
| O(2)-P(2)-O(3)        | 112.0(3) |                  |          |

Symmetry transformations used to generate equivalent atoms:

- #1  $x, -y+1/2, z+1/2$     #2  $-x+2, y+1/2, -z+3/2$   
 #3  $-x+2, y-1/2, -z+3/2$     #4  $-x+1, -y, -z+2$   
 #5  $-x+2, -y, -z+2$     #6  $x, y+1, z$     #7  $x, -y-1/2, z-1/2$   
 #8  $x, -y+1/2, z-1/2$     #9  $x, -y-1/2, z+1/2$   
 #10  $-x+2, -y, -z+1$     #11  $x, y-1, z$

**Table S2(c).** Selected bond distances (Å) and angles (degrees) for Cs<sub>2</sub>Mg<sub>3</sub>(P<sub>2</sub>O<sub>7</sub>)<sub>2</sub>.

|                    |            |                      |            |
|--------------------|------------|----------------------|------------|
| Cs(1)-O(3)         | 3.132(5)   | P(3)-O(11)           | 1.474(6)   |
| Cs(1)-O(4)         | 3.138(5)   | P(3)-O(6)            | 1.497(5)   |
| Cs(1)-O(7)         | 3.178(5)   | P(3)-O(9)            | 1.503(5)   |
| Cs(1)-O(8)#1       | 3.234(5)   | P(3)-O(2)            | 1.598(5)   |
| Cs(1)-O(13)#2      | 3.286(6)   | P(4)-O(7)            | 1.488(5)   |
| Cs(1)-O(7)#2       | 3.327(5)   | P(4)-O(14)           | 1.499(6)   |
| Cs(1)-O(9)         | 3.329(5)   | P(4)-O(10)           | 1.504(6)   |
| Cs(1)-O(6)         | 3.353(6)   | P(4)-O(8)            | 1.592(5)   |
| Cs(1)-O(10)        | 3.594(6)   | O(3)-Cs(1)-O(4)      | 150.74(14) |
| Cs(1)-O(10)#1      | 3.615(6)   | O(3)-Cs(1)-O(7)      | 99.39(14)  |
| Cs(2)-O(14)#1      | 3.076(6)   | O(4)-Cs(1)-O(8)#1    | 135.72(13) |
| Cs(2)-O(12)#3      | 3.123(6)   | O(7)-Cs(1)-O(8)#1    | 94.81(13)  |
| Cs(2)-O(1)         | 3.188(6)   | O(3)-Cs(1)-O(13)#2   | 141.04(14) |
| Cs(2)-O(2)#4       | 3.210(5)   | O(4)-Cs(1)-O(13)#2   | 57.99(14)  |
| Cs(2)-O(11)#4      | 3.376(6)   | O(7)-Cs(1)-O(13)#2   | 57.27(14)  |
| Cs(2)-O(5)#3       | 3.432(6)   | O(8)#1-Cs(1)-O(13)#2 | 150.36(14) |
| Cs(2)-O(9)         | 3.457(5)   | O(3)-Cs(1)-O(7)#2    | 55.99(13)  |
| Cs(2)-O(5)#4       | 3.464(5)   | O(4)-Cs(1)-O(7)#2    | 103.78(14) |
| Cs(2)-O(8)#1       | 3.506(6)   | O(7)-Cs(1)-O(7)#2    | 116.00(10) |
| Cs(2)-O(12)#4      | 3.650(6)   | O(8)#1-Cs(1)-O(7)#2  | 97.82(13)  |
| Cs(2)-O(11)        | 3.669(6)   | O(13)#2-Cs(1)-O(7)#2 | 103.36(14) |
| Mg(1)-O(13)#5      | 1.912(6)   | O(3)-Cs(1)-O(9)      | 85.64(13)  |
| Mg(1)-O(3)         | 1.919(6)   | O(4)-Cs(1)-O(9)      | 68.26(13)  |
| Mg(1)-O(4)#3       | 1.920(6)   | O(7)-Cs(1)-O(9)      | 165.79(13) |
| Mg(1)-O(7)#2       | 1.933(6)   | O(8)#1-Cs(1)-O(9)    | 79.43(13)  |
| Mg(2)-O(9)#6       | 1.910(6)   | O(13)#2-Cs(1)-O(9)   | 125.04(14) |
| Mg(2)-O(11)#4      | 1.913(6)   | O(7)#2-Cs(1)-O(9)    | 77.86(13)  |
| Mg(2)-O(14)#1      | 1.917(6)   | O(3)-Cs(1)-O(6)      | 101.57(14) |
| Mg(2)-O(12)#7      | 1.935(6)   | O(4)-Cs(1)-O(6)      | 68.70(14)  |
| Mg(3)-O(6)         | 1.893(6)   | O(7)-Cs(1)-O(6)      | 122.47(13) |
| Mg(3)-O(1)#8       | 1.929(6)   | O(8)#1-Cs(1)-O(6)    | 67.02(13)  |
| Mg(3)-O(10)#1      | 1.935(6)   | O(13)#2-Cs(1)-O(6)   | 117.19(14) |
| Mg(3)-O(5)#6       | 1.948(6)   | O(7)#2-Cs(1)-O(6)    | 120.21(13) |
| P(1)-O(1)          | 1.485(6)   | O(9)-Cs(1)-O(6)      | 43.32(12)  |
| P(1)-O(3)          | 1.496(5)   | O(3)-Cs(1)-O(10)     | 65.56(13)  |
| P(1)-O(13)         | 1.507(6)   | O(4)-Cs(1)-O(10)     | 134.79(13) |
| P(1)-O(8)#1        | 1.611(5)   | O(7)-Cs(1)-O(10)     | 42.58(13)  |
| P(2)-O(12)         | 1.509(5)   | O(8)#1-Cs(1)-O(10)   | 87.77(13)  |
| P(2)-O(5)          | 1.510(5)   | O(13)#2-Cs(1)-O(10)  | 77.86(13)  |
| P(2)-O(4)          | 1.511(6)   | O(7)#2-Cs(1)-O(10)   | 75.54(13)  |
| P(2)-O(2)          | 1.599(5)   | O(9)-Cs(1)-O(10)     | 148.50(12) |
| O(6)-Cs(1)-O(10)   | 151.03(13) | O(2)#4-Cs(2)-O(5)#3  | 117.57(13) |
| O(3)-Cs(1)-O(10)#1 | 84.47(12)  | O(11)#4-Cs(2)-O(5)#3 | 155.55(13) |

|                       |            |                       |            |
|-----------------------|------------|-----------------------|------------|
| O(4)-Cs(1)-O(10)#1    | 107.81(14) | O(14)#1-Cs(2)-O(9)    | 92.68(14)  |
| O(7)-Cs(1)-O(10)#1    | 77.04(13)  | O(12)#3-Cs(2)-O(9)    | 54.97(13)  |
| O(8)#1-Cs(1)-O(10)#1  | 41.30(12)  | O(1)-Cs(2)-O(9)       | 99.31(14)  |
| O(13)#2-Cs(1)-O(10)#1 | 115.15(14) | O(2)#4-Cs(2)-O(9)     | 120.89(13) |
| O(7)#2-Cs(1)-O(10)#1  | 139.12(12) | O(11)#4-Cs(2)-O(9)    | 106.45(13) |
| O(9)-Cs(1)-O(10)#1    | 90.33(13)  | O(5)#3-Cs(2)-O(9)     | 97.10(12)  |
| O(6)-Cs(1)-O(10)#1    | 52.84(13)  | O(14)#1-Cs(2)-O(5)#4  | 132.79(14) |
| O(10)-Cs(1)-O(10)#1   | 98.85(13)  | O(12)#3-Cs(2)-O(5)#4  | 83.73(14)  |
| O(3)-Cs(1)-O(8)       | 100.95(12) | O(1)-Cs(2)-O(5)#4     | 150.96(14) |
| O(4)-Cs(1)-O(8)       | 96.37(12)  | O(2)#4-Cs(2)-O(5)#4   | 43.87(13)  |
| O(7)-Cs(1)-O(8)       | 41.19(12)  | O(11)#4-Cs(2)-O(5)#4  | 78.20(13)  |
| O(8)#1-Cs(1)-O(8)     | 124.68(9)  | O(5)#3-Cs(2)-O(5)#4   | 95.81(12)  |
| O(13)#2-Cs(1)-O(8)    | 40.43(12)  | O(9)-Cs(2)-O(5)#4     | 89.57(12)  |
| O(7)#2-Cs(1)-O(8)     | 82.64(12)  | O(14)#1-Cs(2)-O(8)#1  | 43.22(13)  |
| O(9)-Cs(1)-O(8)       | 151.06(12) | O(12)#3-Cs(2)-O(8)#1  | 92.71(13)  |
| O(6)-Cs(1)-O(8)       | 154.50(12) | O(1)-Cs(2)-O(8)#1     | 43.27(13)  |
| O(10)-Cs(1)-O(8)      | 38.43(11)  | O(2)#4-Cs(2)-O(8)#1   | 140.56(12) |
| O(10)#1-Cs(1)-O(8)    | 118.20(12) | O(11)#4-Cs(2)-O(8)#1  | 98.84(12)  |
| O(3)-Cs(1)-O(10)#2    | 95.87(12)  | O(5)#3-Cs(2)-O(8)#1   | 93.77(12)  |
| O(4)-Cs(1)-O(10)#2    | 65.23(13)  | O(9)-Cs(2)-O(8)#1     | 74.07(12)  |
| O(7)-Cs(1)-O(10)#2    | 118.06(13) | O(5)#4-Cs(2)-O(8)#1   | 161.95(12) |
| O(8)#1-Cs(1)-O(10)#2  | 133.85(12) | O(14)#1-Cs(2)-O(12)#4 | 131.48(14) |
| O(13)#2-Cs(1)-O(10)#2 | 73.92(13)  | O(12)#3-Cs(2)-O(12)#4 | 94.29(13)  |
| O(7)#2-Cs(1)-O(10)#2  | 40.12(12)  | O(1)-Cs(2)-O(12)#4    | 117.60(13) |
| O(9)-Cs(1)-O(10)#2    | 74.25(13)  | O(2)#4-Cs(2)-O(12)#4  | 40.94(12)  |
| O(6)-Cs(1)-O(10)#2    | 112.21(13) | O(11)#4-Cs(2)-O(12)#4 | 83.72(13)  |
| O(10)-Cs(1)-O(10)#2   | 95.37(15)  | O(5)#3-Cs(2)-O(12)#4  | 76.82(12)  |
| O(10)#1-Cs(1)-O(10)#2 | 164.47(19) | O(9)-Cs(2)-O(12)#4    | 126.89(12) |
| O(8)-Cs(1)-O(10)#2    | 77.05(12)  | O(5)#4-Cs(2)-O(12)#4  | 40.50(12)  |
| O(14)#1-Cs(2)-O(12)#3 | 133.87(15) | O(8)#1-Cs(2)-O(12)#4  | 157.49(12) |
| O(14)#1-Cs(2)-O(1)    | 74.74(15)  | O(14)#1-Cs(2)-O(11)   | 88.01(15)  |
| O(12)#3-Cs(2)-O(1)    | 79.10(15)  | O(12)#3-Cs(2)-O(11)   | 85.16(13)  |
| O(14)#1-Cs(2)-O(2)#4  | 97.55(14)  | O(1)-Cs(2)-O(11)      | 135.98(13) |
| O(12)#3-Cs(2)-O(2)#4  | 126.28(14) | O(2)#4-Cs(2)-O(11)    | 81.85(12)  |
| O(1)-Cs(2)-O(2)#4     | 139.56(14) | O(11)#4-Cs(2)-O(11)   | 70.70(7)   |
| O(14)#1-Cs(2)-O(11)#4 | 56.00(14)  | O(5)#3-Cs(2)-O(11)    | 128.31(13) |
| O(12)#3-Cs(2)-O(11)#4 | 154.34(14) | O(9)-Cs(2)-O(11)      | 40.39(12)  |
| O(1)-Cs(2)-O(11)#4    | 124.43(15) | O(5)#4-Cs(2)-O(11)    | 64.51(13)  |
| O(2)#4-Cs(2)-O(11)#4  | 43.50(13)  | O(8)#1-Cs(2)-O(11)    | 97.61(12)  |
| O(14)#1-Cs(2)-O(5)#3  | 130.51(14) | O(12)#4-Cs(2)-O(11)   | 104.28(12) |
| O(12)#3-Cs(2)-O(5)#3  | 43.92(13)  | O(13)#5-Mg(1)-O(3)    | 106.0(3)   |
| O(1)-Cs(2)-O(5)#3     | 55.83(14)  | O(13)#5-Mg(1)-O(4)#3  | 108.9(3)   |
| O(13)#5-Mg(1)-O(7)#2  | 115.9(3)   | O(12)-P(2)-O(5)       | 109.7(3)   |
| O(3)-Mg(1)-O(4)#3     | 111.3(3)   | O(3)-P(1)-O(8)#1      | 101.4(3)   |

---

|                       |          |                  |          |
|-----------------------|----------|------------------|----------|
| O(3)-Mg(1)-O(7)#2     | 104.1(2) | O(12)-P(2)-O(4)  | 115.3(3) |
| O(4)#3-Mg(1)-O(7)#2   | 110.5(3) | O(5)-P(2)-O(4)   | 112.9(3) |
| O(9)#6-Mg(2)-O(11)#4  | 118.5(3) | O(12)-P(2)-O(2)  | 103.1(3) |
| O(9)#6-Mg(2)-O(14)#1  | 112.6(3) | O(5)-P(2)-O(2)   | 107.3(3) |
| O(11)#4-Mg(2)-O(14)#1 | 105.1(3) | O(4)-P(2)-O(2)   | 107.9(3) |
| O(9)#6-Mg(2)-O(12)#7  | 105.0(3) | O(11)-P(3)-O(6)  | 114.0(4) |
| O(11)#4-Mg(2)-O(12)#7 | 110.4(3) | O(11)-P(3)-O(9)  | 112.0(3) |
| O(14)#1-Mg(2)-O(12)#7 | 104.4(3) | O(6)-P(3)-O(9)   | 110.5(3) |
| O(6)-Mg(3)-O(1)#8     | 101.1(3) | O(11)-P(3)-O(2)  | 105.4(3) |
| O(6)-Mg(3)-O(10)#1    | 108.6(3) | O(6)-P(3)-O(2)   | 107.3(3) |
| O(1)#8-Mg(3)-O(10)#1  | 108.6(3) | O(9)-P(3)-O(2)   | 107.1(3) |
| O(6)-Mg(3)-O(5)#6     | 110.6(3) | O(7)-P(4)-O(14)  | 113.9(3) |
| O(1)#8-Mg(3)-O(5)#6   | 106.5(3) | O(7)-P(4)-O(10)  | 112.6(3) |
| O(10)#1-Mg(3)-O(5)#6  | 119.8(3) | O(14)-P(4)-O(10) | 110.3(4) |
| O(1)-P(1)-O(3)        | 113.2(4) | O(7)-P(4)-O(8)   | 110.0(3) |
| O(1)-P(1)-O(13)       | 113.4(4) | O(14)-P(4)-O(8)  | 105.2(3) |
| O(3)-P(1)-O(13)       | 114.4(3) | O(10)-P(4)-O(8)  | 104.1(3) |
| O(1)-P(1)-O(8)#1      | 106.7(3) |                  |          |

---

Symmetry transformations used to generate equivalent atoms:

- #1  $-x+1, y-1/2, -z+3/2$     #2  $-x+1, y+1/2, -z+3/2$   
#3  $x, -y+1/2, z-1/2$     #4  $-x, y-1/2, -z+3/2$   
#5  $-x+1, -y, -z+1$     #6  $x, y-1, z$     #7  $x, -y-1/2, z-1/2$   
#8  $x, -y-1/2, z+1/2$     #9  $x, y+1, z$     #10  $-x, y+1/2, -z+3/2$   
#11  $x, -y+1/2, z+1/2$

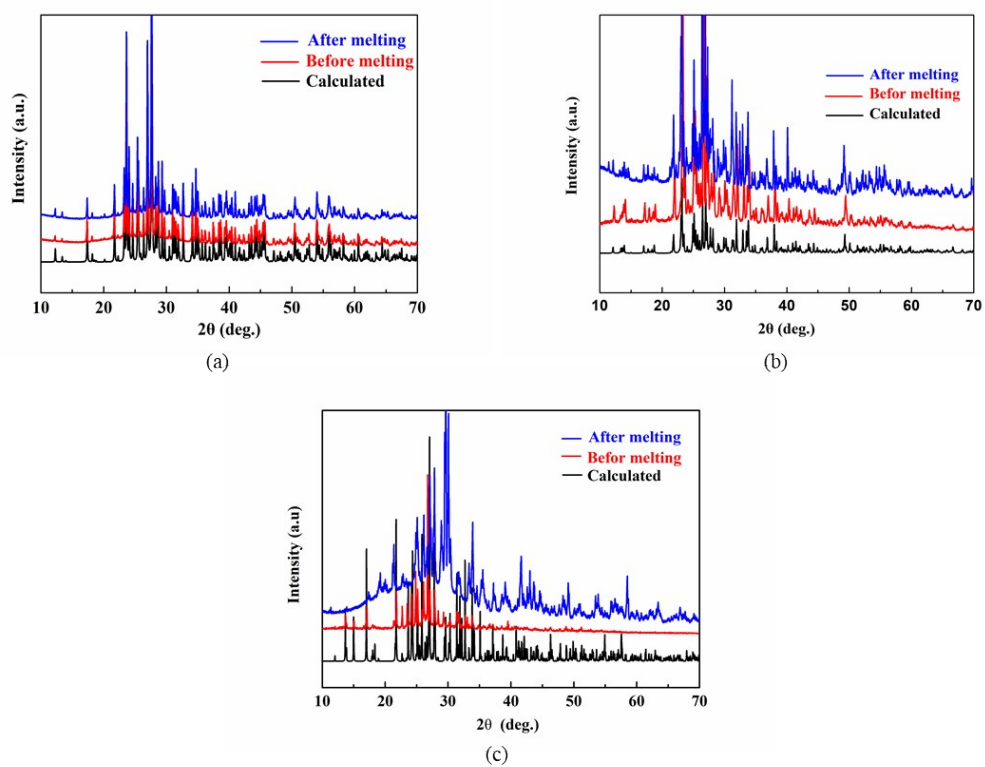

**Figure S1.** Powder XRD of (a)  $\text{Rb}_2\text{Zn}_3(\text{P}_2\text{O}_7)_2$ , (b)  $\text{Cs}_2\text{Zn}_3(\text{P}_2\text{O}_7)_2$  and (c)  $\text{Cs}_2\text{Mg}_3(\text{P}_2\text{O}_7)_2$ .

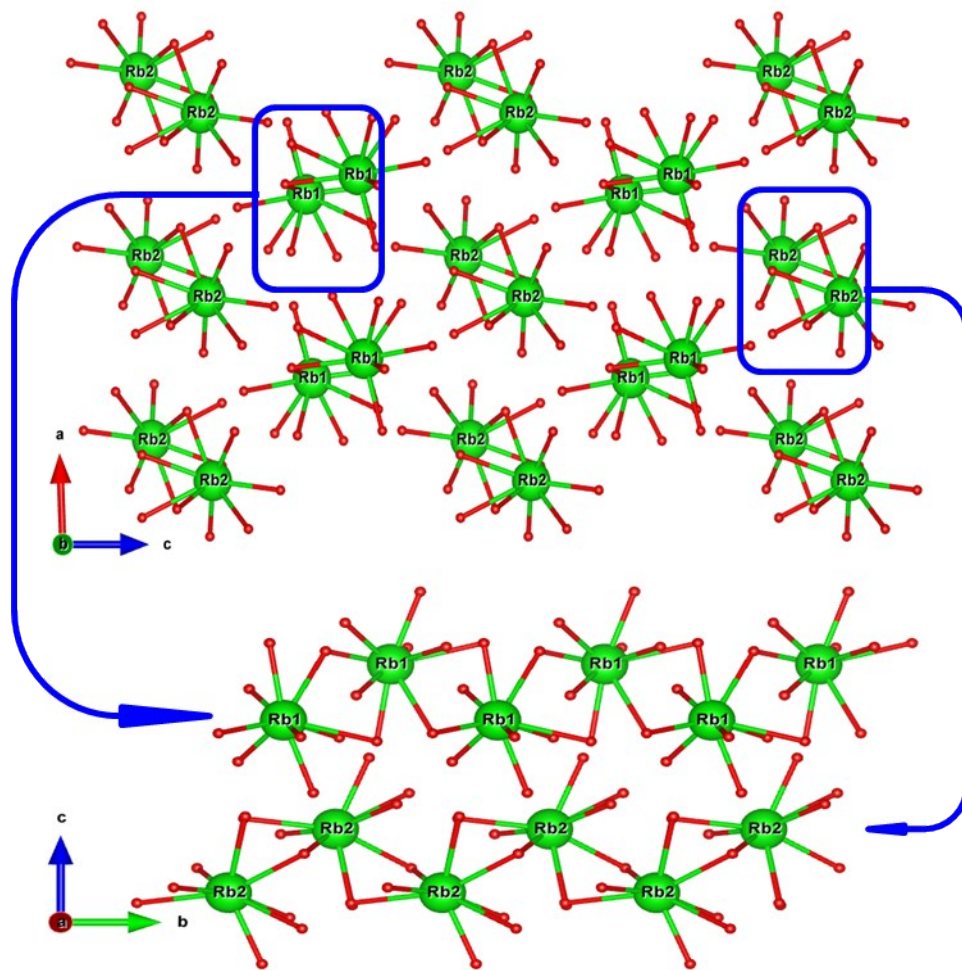

**Figure S2.** The  $[\text{Rb}(1)\text{O}_9]_\infty$  and  $[\text{Rb}(2)\text{O}_9]_\infty$  chains in  $\text{Rb}_2\text{Zn}_3(\text{P}_2\text{O}_7)_2$ .



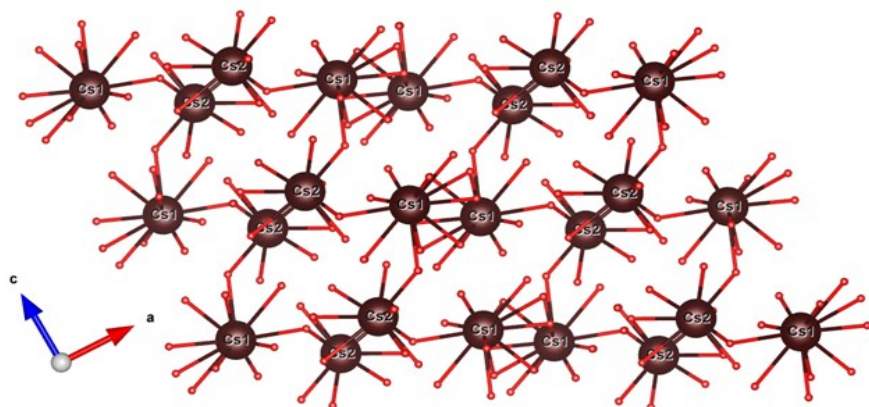

(a)

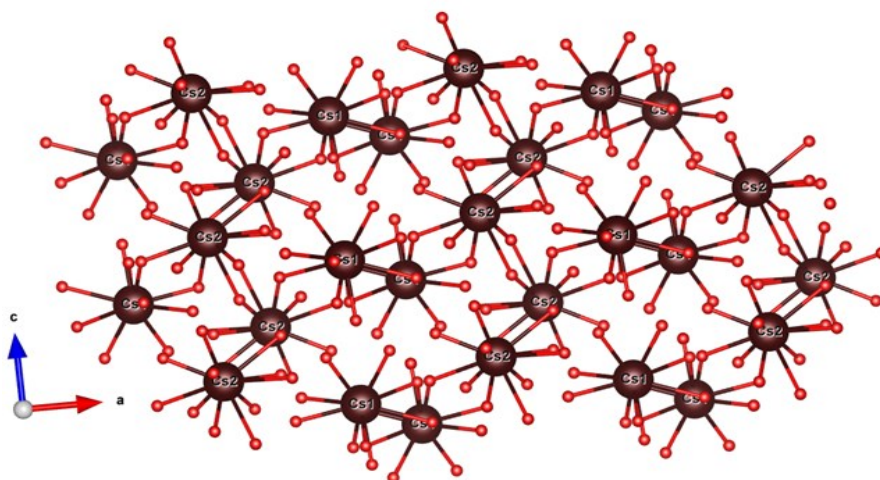

(b)

**Figure S3.** (a). The 3D framework composed of Cs-O polyhedra in  $\text{Cs}_2\text{Zn}_3(\text{P}_2\text{O}_7)_2$ ; (b). The 3D framework composed of Cs-O polyhedra in  $\text{Cs}_2\text{Mg}_3(\text{P}_2\text{O}_7)_2$ .



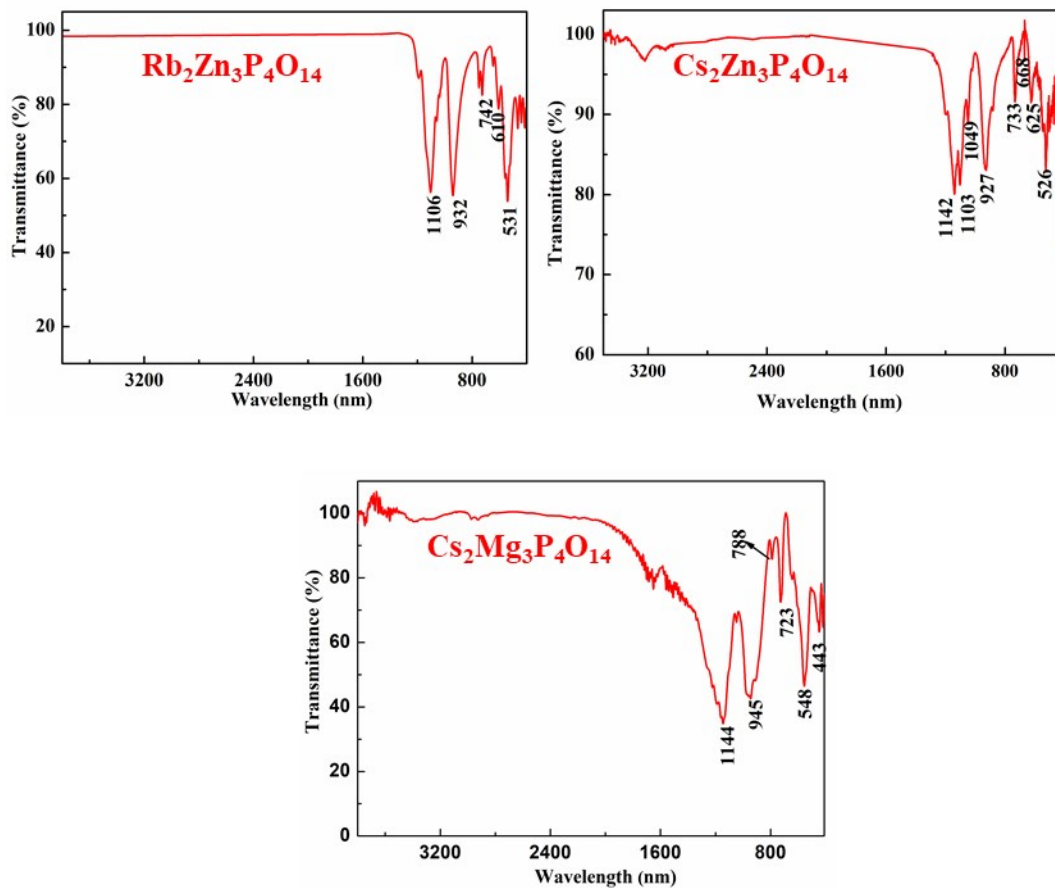

**Figure S4.** IR spectra of  $\text{Rb}_2\text{Zn}_3(\text{P}_2\text{O}_7)_2$ ,  $\text{Cs}_2\text{Zn}_3(\text{P}_2\text{O}_7)_2$  and  $\text{Cs}_2\text{Mg}_3(\text{P}_2\text{O}_7)_2$ .

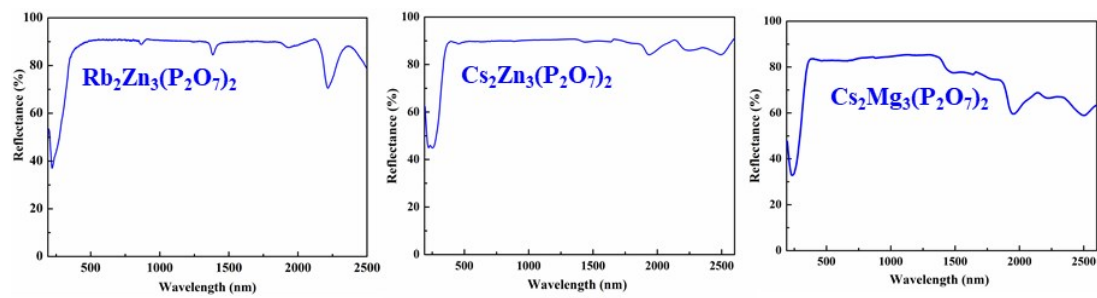

**Figure S5.** The UV-VIS-NIR diffuse reflectance spectra of  $\text{Rb}_2\text{Zn}_3(\text{P}_2\text{O}_7)_2$ ,  $\text{Cs}_2\text{Zn}_3(\text{P}_2\text{O}_7)_2$  and  $\text{Cs}_2\text{Mg}_3(\text{P}_2\text{O}_7)_2$ .

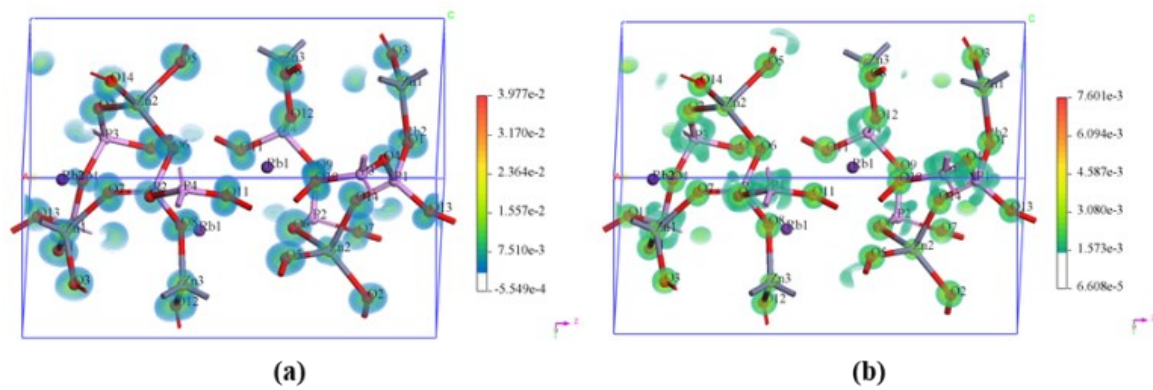

**Figure S6.** Virtual electron (VE) (a) occupied, and virtual electron (VE) (b) unoccupied orbitals of  $\text{Rb}_2\text{Zn}_3(\text{P}_2\text{O}_7)_2$

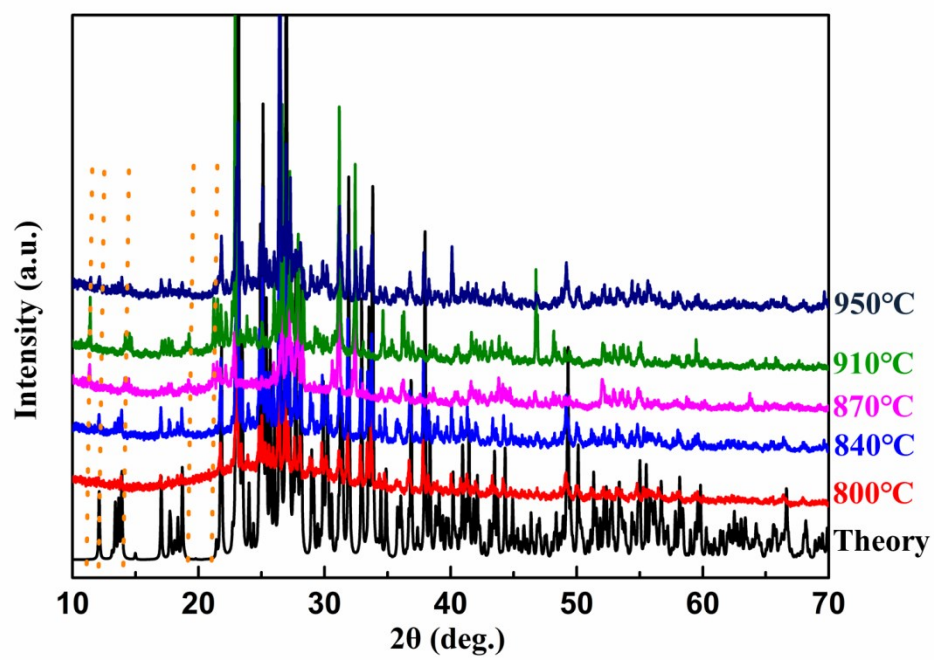

**Figure S7.** The Powder XRD patterns of  $\text{Cs}_2\text{Zn}_3(\text{P}_2\text{O}_7)_2$  at different temperature.
